# Supplementary material for: Efficacy and Safety of Prothrombin Complex Concentrates in Liver Transplantation: Evidence from Observational Studies
Source: MDPI journal article supplement (doi:10.3390/jcm12113749), 2023-05-29
Supplement: s1 [file s1]

### Online Supplementary Content

|                    |                                                                                                    |
|--------------------|----------------------------------------------------------------------------------------------------|
| <b>Document S1</b> | Search Strategy                                                                                    |
| <b>Figure S1</b>   | Forest plot of RBC units excluding study with living donor                                         |
| <b>Figure S2</b>   | Forest plot of FFP units excluding study with living donor                                         |
| <b>Figure S3</b>   | Forest plot of cryoprecipitate units excluding study with living donor                             |
| <b>Figure S4</b>   | Forest plot of RBC units including studies with MELD score > 25                                    |
| <b>Figure S5</b>   | Forest plot of FFP units including studies with MELD score > 25                                    |
| <b>Figure S6</b>   | Forest plot of cryoprecipitate units including studies with MELD score > 25                        |
| <b>Figure S7</b>   | Forest plot of RBC units including studies reporting type of PCC product administered              |
| <b>Table S1</b>    | Risk of bias table for assessing the quality of cohort studies by using the Newcastle-Ottawa Scale |

## **Document S1**

### **Search Strategy PCC in liver transplantation**

#### **1. Cochrane CENTRAL search strategy CENTRAL (via onlinelibrary.wiley.com)**

#1 ("prothrombin complex concentrate"):ti,ab,kw  
#2 (pcc\*):ti,ab,kw  
#3 #1 OR #2  
#4 liver OR hepatic OR hepato  
#5 MeSH descriptor: [Liver] explode all trees  
#6 #4 OR #5  
#7 resection OR segmentectomy OR graft\* OR transplant\*  
#8 #6 AND #7  
#9 hepatectomy  
#10 MeSH descriptor: [Hepatectomy] explode all trees  
#11 MeSH descriptor: [Liver Transplantation] explode all trees  
#12 #8 OR #9 OR #10 OR #11  
#13 #3 AND #12

#### **2. Pubmed/MEDLINE search strategy MEDLINE 1946 to 5<sup>th</sup> August 2022.**

(prothrombin complex concentrate) AND (((liver OR hepatic OR hepato OR "liver"[MeSH]) AND (resection OR segmentectomy OR graft\* OR transplant\*)) OR hepatectomy OR "hepatectomy"[MeSH] OR "Liver Transplantation"[MeSH])

#### **3. EMBASE search strategy EMBASE (OvidSP) Database: Embase Classic + Embase, 1947 to 5<sup>th</sup> August 2022.**

#1 prothrombin complex concentrate.tw.  
#2 pcc\*.tw.  
#3 #1 or #2  
#4 (liver or hepatic or hepato).af.  
#5 (segmentectomy or resection or graft\* or transplant\*).af.  
#6 #4 and #5  
#7 hepatectomy.af.  
#8 exp liver resection/ or exp liver transplantation/  
#9 #6 or #7 or #8  
#10 #3 AND #9

#### **4. Scopus Database, search strategy, up to 5<sup>th</sup> August 2022**

"prothrombin complex concentrate" AND "Liver Transplant"

**Figure S1. Forest plot of RBC units excluding study with living donor**

The results show a non-significant effect size favoring the use of PCC. The effect size is reported as mean difference with the corresponding 95% confidence interval (95% CI).

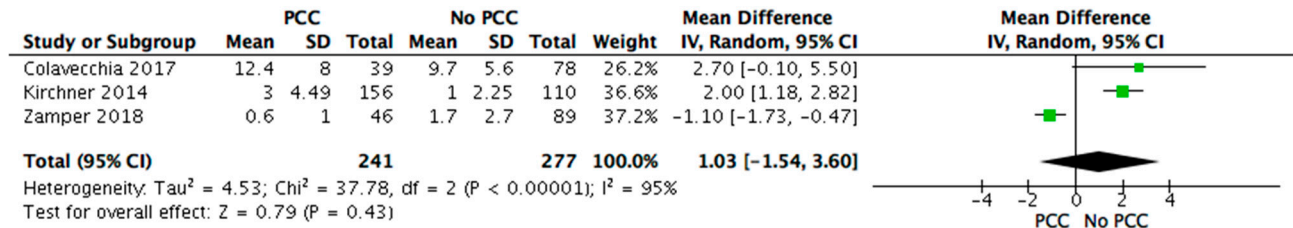

**Figure S2. Forest plot of FFP units excluding study with living donor**

The results show a non-significant effect size favoring the use of PCC. The effect size is reported as mean difference with the corresponding 95% confidence interval (95% CI).

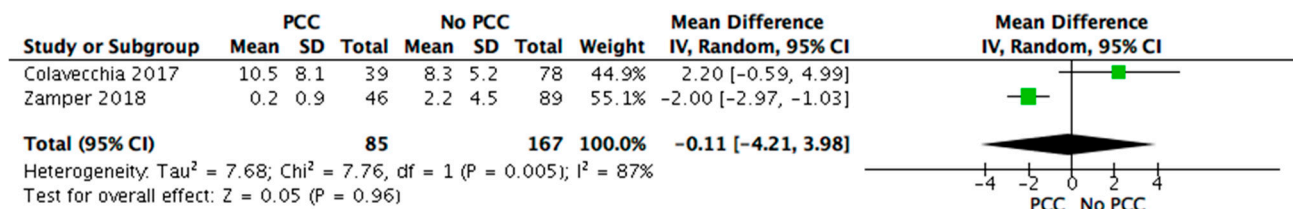

**Figure S3. Forest plot of cryoprecipitate units excluding study with living donor**

The results show a non-significant effect size favoring the use of PCC. The effect size is reported as mean difference with the corresponding 95% confidence interval (95% CI).

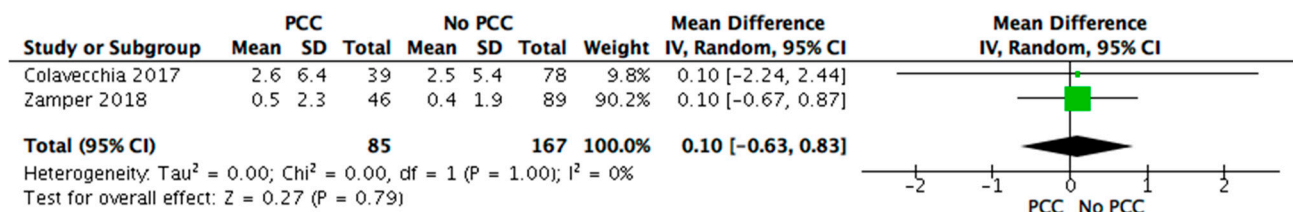

**Figure S4. Forest plot of RBC units including studies with MELD score > 25**

The results show a non-significant effect size favoring the use of PCC. The effect size is reported as mean difference with the corresponding 95% confidence interval (95% CI).

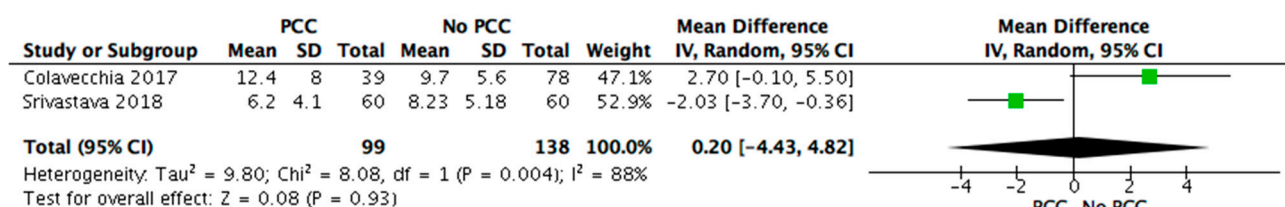

**Figure S5. Forest plot of FFP units including studies with MELD score > 25**

The results show a non-significant effect size favoring the use of PCC. The effect size is reported as mean difference with the corresponding 95% confidence interval (95% CI).

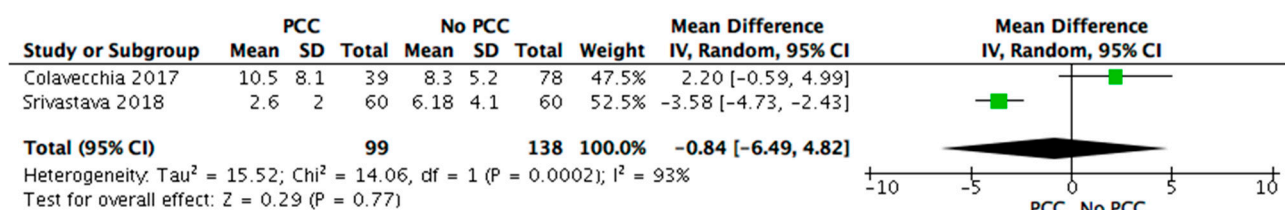

**Figure S6. Forest plot of cryoprecipitate units including studies with MELD score > 25**

The results show a non-significant effect size favoring the use of PCC. The effect size is reported as mean difference with the corresponding 95% confidence interval (95% CI).

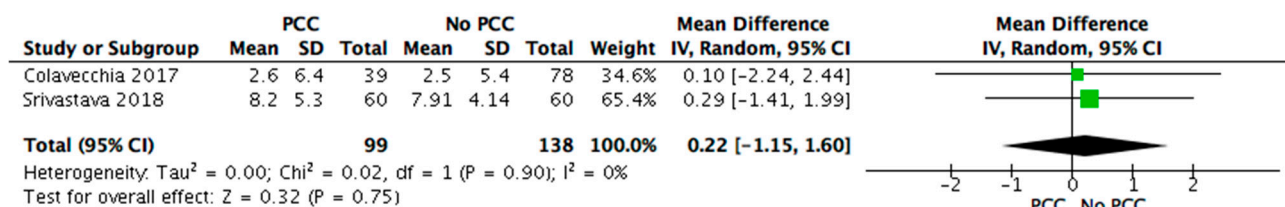

**Figure S7. Forest plot of RBC units including studies reporting type of PCC product administered**

The results show a significant effect size favoring the use of PCC. The effect size is reported as mean difference with the corresponding 95% confidence interval (95% CI).

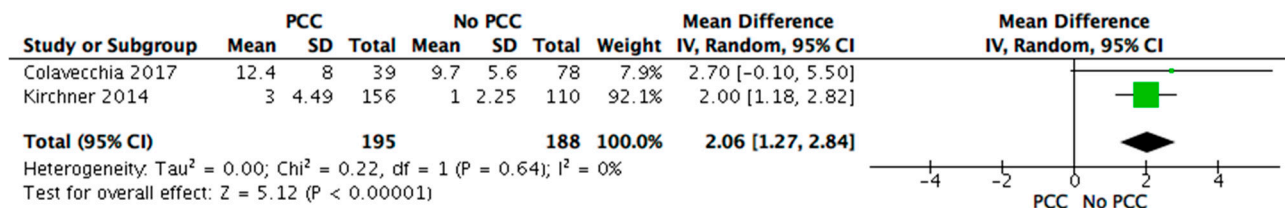

Table S1. Risk of bias table for assessing the quality of cohort studies by using the Newcastle-Ottawa Scale

|                   | Representative<br>nes of the<br>exposed cohort | Selection of<br>the non<br>exposed cohort | Ascertainment of<br>exposure | Demonstration<br>that outcome of<br>interest was not<br>present at start of<br>study | Comparability of<br>cohorts on the<br>basis of the<br>gender | Comparability of<br>cohorts on the<br>basis of the age | Comparabilit<br>y of cohorts<br>on the basis of<br>the MELD<br>score | Assessment of<br>outcome | Was follow-up long<br>enough for outcomes to<br>occur | Adequacy<br>of follow<br>up of<br>cohorts |
|-------------------|------------------------------------------------|-------------------------------------------|------------------------------|--------------------------------------------------------------------------------------|--------------------------------------------------------------|--------------------------------------------------------|----------------------------------------------------------------------|--------------------------|-------------------------------------------------------|-------------------------------------------|
| Colavecchia, 2017 | *                                              | *                                         | *                            | *                                                                                    | *                                                            | *                                                      | *                                                                    | *                        |                                                       | *                                         |
| Kirchner, 2014    |                                                |                                           | *                            | *                                                                                    | *                                                            | *                                                      |                                                                      | *                        |                                                       | *                                         |
| Martinez, 2021    |                                                |                                           | *                            | *                                                                                    | *                                                            | *                                                      | *                                                                    | *                        | *                                                     | *                                         |
| Srivastava, 2018  | *                                              | *                                         | *                            | *                                                                                    | *                                                            | *                                                      | *                                                                    | *                        | *                                                     | *                                         |
| Zamper, 2018      | *                                              | *                                         | *                            | *                                                                                    | *                                                            | *                                                      | *                                                                    | *                        |                                                       | *                                         |
